# Supplementary material for: The LINA Study: Higher Sensitivity of Infant Compared to Maternal Eosinophil/Basophil Progenitors to Indoor Chemical Exposures
Source: Hindawi journal article supplement (doi:10.1155/2016/5293932), 2016-01-01
Supplement: f1 [file 5293932.f1.pdf]

1 **Supplementary data**

2

3 **The LINA study: Higher sensitivity of infant compared to maternal eosinophil/basophil**  
4 **progenitors to indoor chemical exposures**

5

6 Friederike Hoernig<sup>\*,†</sup>, Tibor Kohajda PhD<sup>‡</sup>, Stefan Roeder PhD<sup>§</sup>, Gunda Herberth PhD<sup>\*</sup>,  
7 Martin von Bergen PhD<sup>‡,¶,¶</sup>, Michael Borte MD<sup>\*\*</sup>, Ulrike Diez MD<sup>\*\*</sup>, Ulrike Rolle-Kampczyk  
8 PhD<sup>‡</sup>, Jan-C. Simon MD<sup>††</sup>, Judah A. Denburg MD<sup>‡‡</sup>, Irina Lehmann PhD<sup>\* §§</sup> & Kristin M.  
9 Junge PhD<sup>\* §§</sup>

10

11 §§ Both authors contributed equally to this work

12

13 \* Helmholtz Centre for Environmental Research – UFZ, Leipzig, Department of  
14 Environmental Immunology, Permoserstraße 15, 04318 Leipzig, Germany

15 † LIFE – Leipzig Research Center for Civilization Diseases, University of Leipzig,  
16 Philipp-Rosenthal-Straße 27, 04103 Leipzig, Germany

17 ‡ Helmholtz Centre for Environmental Research – UFZ, Leipzig, Department of  
18 Metabolomics, Permoserstraße 15, 04318 Leipzig, Germany

19 § Helmholtz Centre for Environmental Research – UFZ, Leipzig, Core Facility Studies,  
20 Permoserstraße 15, 04318 Leipzig, Germany

21 ¶ Helmholtz Centre for Environmental Research – UFZ, Leipzig, Department of  
22 Proteomics, Permoserstraße 15, 04318 Leipzig, Germany

23 ¶¶ Aalborg University, Department of Biotechnology, Chemistry and Environmental  
24 Engineering, Niels Jernes Vej 10, 9220 Aalborg East, Denmark

25 \*\* Children’s Hospital, Municipal Hospital “St. Georg”, Academic Teaching Hospital of  
26 the University of Leipzig, Delitzscher Straße 141, 04129 Leipzig, Germany

27 †† University Hospital of Leipzig, Department of Dermatology, Venereology and  
28 Allergology, Philipp-Rosenthal-Straße 23, Haus 10, 04103 Leipzig, Germany

29 ‡‡ McMaster University, Department of Medicine, Division of Clinical Immunology and  
30 Allergy, 1200 Main Street West, L8N 3Z5, Hamilton, ON, Canada

31

32 **Corresponding author:**

33 Dr. Irina Lehmann, Helmholtz-Centre for Environmental Research – UFZ, Department of  
34 Environmental Immunology, Permoserstrasse 15, 04318 Leipzig, mail: [irina.lehmann@ufz.de](mailto:irina.lehmann@ufz.de)

35

## 36 **Supplementary Materials and Methods**

### 37 *Questionnaire data*

38 Ever wheezing was recorded as a parental report of symptoms ('Did your child suffer from  
39 whistling / wheezy respiration during the last twelve months?') with/without the necessity of  
40 medical treatment ('If your child suffered from a whistling/wheezy respiration or cough, was  
41 it treated with drugs or by inhalation?'). Recurrent wheezing was recorded as parental report  
42 of whistling/wheezy respiration in more than two periods within the second year of life.  
43 Bronchitis as well as obstructive bronchitis were recorded as physician diagnoses ('Has a  
44 doctor diagnosed your child with bronchitis/obstructive bronchitis in the last 12 months?').  
45 Exposure to ETS was assessed as smoking frequency at home ('Did you or anybody else  
46 smoke inside your dwelling?'). Answering this question as '(almost) daily', 'once a week or  
47 more' or 'occasionally' was defined as exposure to ETS in the subsequent analyses and  
48 'never' as no exposure to ETS in the dwelling, respectively. Furthermore, the numbers of  
49 smoked cigarettes per day in the dwelling ('How many cigarettes per day were smoked by the  
50 mother/father/anybody else in your dwelling?') was considered. In the subsequent analyses  
51 the sum of smoked cigarettes per day of all persons living in the dwelling was used for  
52 correlations.

53 Exposure to disinfectants was assessed by the frequency of their usage in the dwelling ('How  
54 often did you use disinfectants in the household?'). Answering this question as 'once a week  
55 or more', 'once a month or more' or 'occasionally' was defined as exposure to disinfectants in  
56 the subsequent analyses and 'never' as no exposure to disinfectants in the dwelling,  
57 respectively.

58

### 59 *Analyses of urinary cotinine concentration*

60 Cotinine was analyzed in the urine of the mothers at the child's first birthday. After  
61 dichloromethane extraction and chromatographic separation with a Chromolith Speed ROD

62 column (Merck, Darmstadt, Germany) cotinine was determined using turbo ionspray  
63 ionization on the LC/MS/MS device API 4000 (Applied Biosystems, Darmstadt, Germany).

64 Analysis of creatinine as a measure for individual urinary dilution was used for  
65 standardization of the metabolite.

66

67 **Supplementary Tables**

68 **Table A.1** Number of relevant cases for analyses of indoor chemical exposures and IL-3, IL-5  
 69 or GM-CSF stimulated Eo/B CFUs of mothers and infants. Data resulting from sub-groups  
 70 N<5 (cases in brackets) are not shown in our main document.

|                                                    | Eo/B CFUs mother N=66 |              |                | Eo/B CFUs child N=68 |              |                |
|----------------------------------------------------|-----------------------|--------------|----------------|----------------------|--------------|----------------|
|                                                    | IL-3<br>N=63          | IL-5<br>N=36 | GM-CSF<br>N=11 | IL-3<br>N=67         | IL-5<br>N=66 | GM-CSF<br>N=56 |
| <b>Exposure to ETS in dwelling*</b>                |                       |              |                |                      |              |                |
| yes                                                | 6                     | (2)          | (2)            | 7                    | 7            | 7              |
| no                                                 | 56                    | (34)         | (9)            | 59                   | 58           | 48             |
| <b>Number of smoked cigarettes/day in dwelling</b> |                       |              |                |                      |              |                |
| >0                                                 | 6                     | (2)          | (2)            | 7                    | 7            | 7              |
| 0                                                  | 56                    | (34)         | (9)            | 59                   | 58           | 48             |
| <b>Usage of disinfectant</b>                       |                       |              |                |                      |              |                |
| yes                                                | 37                    | 20           | 5              | 40                   | 40           | 36             |
| no                                                 | 24                    | 15           | 6              | 25                   | 23           | 18             |
| <b>VOCs†</b>                                       | 63                    | 36           | 11             | 67                   | 66           | 56             |

71 \*yes = (almost) daily, once a week or more or occasionally; no= never

72 †N may differ due to missing data

73

74 **Supplementary Figures**

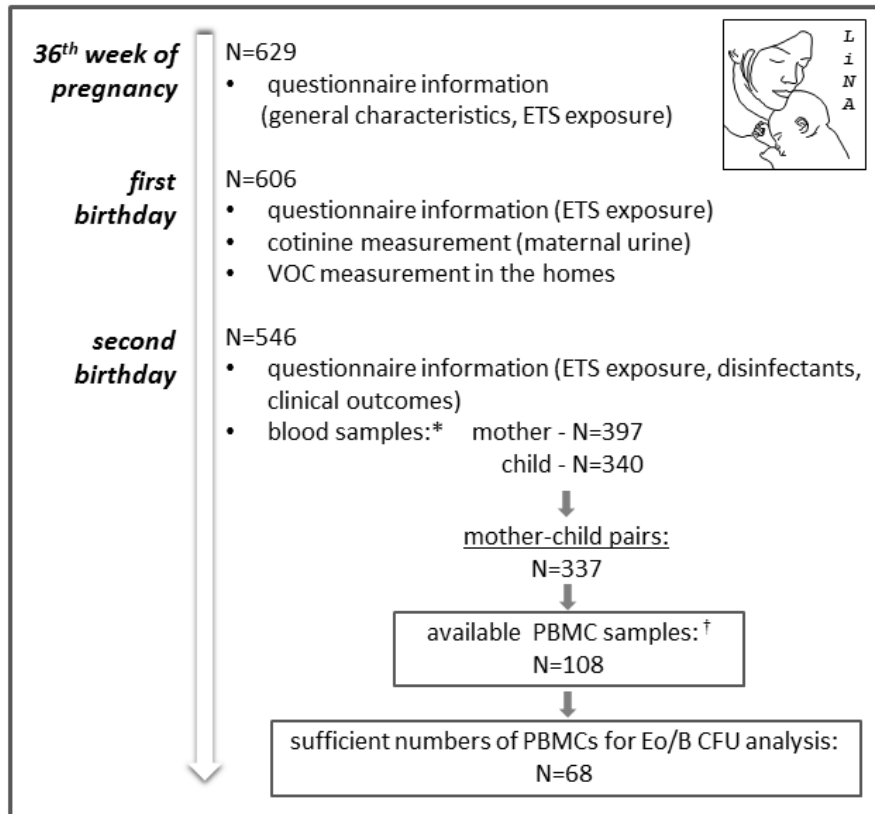

\* out of N=546 subjects 139 did not participate in the 2 year examination; 10 mothers denied blood collection from themselves and 67 from their children

† due to limitations of blood volume PBMCs could not be isolated from all samples

75

76 **Figure A.1 Relevant N-numbers for Eo/B CFU analysis within the LINA study.**

77 Overview about relevant N-numbers and selected information/data from the LINA study

78 which are used in the current paper. Questionnaire information always refers to the previous

79 12 months.
